# Supplementary material
Source: ML conference proceedings conference paper supplement (https://proceedings.neurips.cc/paper_files/paper/2018/hash/7b13b2203029ed80337f27127a9f1d28-Abstract.html)
Supplement: Supplementary file [file 7b13b2203029ed80337f27127a9f1d28-Supplemental.zip]

## Appendix

### A Additional figures

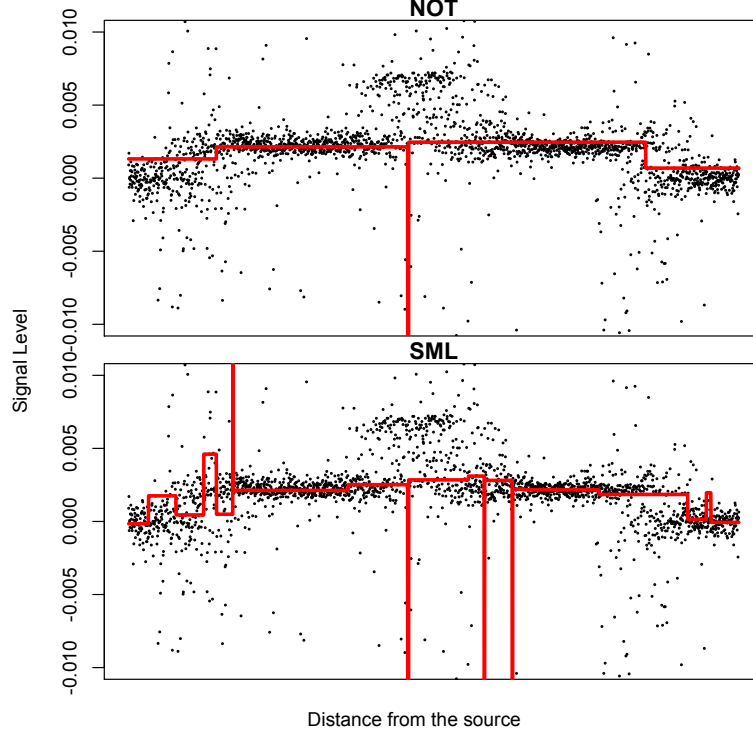

Figure A.1: Detection of the dose changes in the DMOS system using the SML method with a normal prior and the maximal number of change points of 30, and the NOT method.

### B Proofs

Let  $g'(\mu)$  and  $g''(\mu)$  denote the first and second derivatives of a generic function  $g(\mu)$  with respect to  $\mu$  respectively, and further define the utility function as

$$U_k(\mu) = - \sum_{l=\tau_k}^{\tau_{k+1}-1} (Y_l - \bar{Y}_{\tau_k} - \mu)^2.$$

The following conditions are imposed for the theoretical derivations.

- (A1) Assume  $\mu$  to be in a closed set of points in  $\mathbb{R}$ .
- (A2) Assume  $\pi(\mu)$  to be a continuous density function with bounded first and second derivatives.
- (A3) Assume that  $\Pr\{\mathbf{Y}_n | \mathcal{T}(p)\}$  has a unique maximizer in the neighborhood of  $\mathcal{T}_0(p_0)$ .

**Lemma 1.** Assume that  $\tau_k$  is a change point for which the mean of  $Y_l - \bar{Y}_{\tau_k}$  satisfies  $|\mu_{k0}| > \delta$  for  $\delta > 0$ ,  $n_k^{1/2} \delta / \sigma \rightarrow \infty$ , then there is a constant  $D > 0$  such that

$$\lim_{n \rightarrow \infty} \Pr \left[ \frac{\int \prod_{l=\tau_k}^{\tau_{k+1}-1} \exp\{-(Y_l - \bar{Y}_{\tau_k} - \mu)^2\} \pi(\mu) d\mu}{\prod_{l=\tau_k}^{\tau_{k+1}-1} \exp\{-(Y_l - \bar{Y}_{\tau_k})^2\}} > \exp(D n_k \delta^2) \right] = 1.$$

Proof: By the definition of  $U_k(\mu)$ , we can write

$$\frac{\int \prod_{l=\tau_k}^{\tau_{k+1}-1} \exp\{-(Y_l - \bar{Y}_{\tau_k} - \mu)^2\} \pi(\mu) d\mu}{\prod_{l=\tau_k}^{\tau_{k+1}-1} \exp\{-(Y_l - \bar{Y}_{\tau_k})^2\}} = \frac{\int \exp\{U_k(\mu)\} \pi(\mu) d\mu}{\exp\{U_k(0)\}}.$$

We first define  $\mathcal{N}_\delta(\mu_{k0}) = \{\mu : |\mu - \mu_{k0}| < \delta\}$  and denote  $\mathcal{N}_\delta^c(\mu_{k0})$  as its compliment, and then show

$$\lim_{n \rightarrow \infty} \Pr \left[ \sup_{\mu \in \mathcal{N}_\delta^c(\mu_{k0})} \{U_k(\mu) - U_k(\mu_{k0})\} < -Dn_k \delta^2 \right] = 1.$$

Note that

$$\begin{aligned} U_k(\mu) - U_k(\mu_{k0}) &= n_k \left\{ (\mu_{k0}^2 - \mu^2) - n_k^{-1} (\mu_{k0} - \mu) \sum_{l=\tau_k}^{\tau_{k+1}-1} 2(Y_l - \bar{Y}_{\tau_k}) \right\} \\ &= n_k \{ (\mu_{k0}^2 - \mu^2) - 2(\mu_{k0} - \mu) \mu_{k0} + O_p(n_k^{1/2} |\mu_{k0} - \mu| \sigma_k) \} \\ &= n_k \{ -(\mu - \mu_{k0})^2 \} + O_p(n_k^{1/2} |\mu_{k0} - \mu| \sigma_k) \\ &\leq -n_k \delta^2 + O_p(n_k^{1/2} |\mu_{k0} - \mu| \sigma_k) \\ &= -n_k \delta^2 / 2 - n_k \delta^2 / 2 + O_p(n_k^{1/2} |\mu_{k0} - \mu| \sigma_k). \end{aligned}$$

As  $n_k^{1/2} \delta / \sigma \rightarrow \infty$ , we have  $-n_k \delta^2 / 2 + O_p(n_k^{1/2} |\mu_{k0} - \mu| \sigma_k) < 0$  with probability 1, and thus

$$\lim_{n \rightarrow \infty} \Pr \left[ \sup_{\mu \in \mathcal{N}_\delta^c(\mu_{k0})} \{U_k(\mu) - U_k(\mu_{k0})\} < -Dn_k \delta^2 \right] = 1.$$

When  $\tau_k$  is a change point, let  $\mu = 0$ , because  $|\mu_{k0}| > \delta$ , we have

$$\lim_{n \rightarrow \infty} \Pr \left[ \frac{\exp\{U_k(0)\}}{\exp\{U_k(\mu_{k0})\}} < \exp(-Dn_k \delta^2) \right] = 1. \quad (2)$$

By the Laplace approximation,

$$\int \exp\{U_k(\mu)\} \pi(\mu) d\mu = O_p[-U_k''(\tilde{\mu})^{-1/2} \exp\{U_k(\tilde{\mu})\} \pi(\tilde{\mu})], \quad (3)$$

where  $\tilde{\mu}$  is the maximizer of  $U_k(\mu) + \log\{\pi(\mu)\}$ , and  $U_k''(\tilde{\mu}) = O_p(n_j)$ . Let  $\hat{\mu}$  be the maximizer of  $U_k(\mu)$ , and then

$$\begin{aligned} 0 &= L'_k(\tilde{\mu}) + \partial \log \pi(\tilde{\mu}) / \partial \mu \\ &= L''_k(\mu^*)(\tilde{\mu} - \hat{\mu}) + \partial \log \pi(\tilde{\mu}) / \partial \mu, \end{aligned}$$

where  $\mu^*$  is a point on the line segment between  $\tilde{\mu}$  and  $\hat{\mu}$ . As  $\pi(\mu)$  has two bounded derivatives by condition (A2),  $L''_k(\mu^*) = O_p(n_j)$ , we have  $\tilde{\mu} - \hat{\mu} = O_p(n_j^{-1})$ . Therefore, (3) can be written as

$$\begin{aligned} \int \exp\{U_k(\mu)\} \pi(\mu) d\mu &= O_p[-U_k''(\hat{\mu})^{-1/2} \exp\{U_k(\hat{\mu})\} \pi(\hat{\mu})] \\ &= O_p[-U_k''(\mu_{k0})^{-1/2} \exp\{U_k(\mu_{k0})\} \pi(\mu_{k0})], \end{aligned} \quad (4)$$

where the last equality holds because  $\hat{\mu}$  is the least squares estimator. This implies

$$\frac{\exp\{U_k(\mu_{k0})\}}{\int \exp\{U_k(\mu)\} \pi(\mu) d\mu} = O_p(n_k^{1/2}),$$

which in conjunction with (2) leads to

$$\lim_{n \rightarrow \infty} \Pr \left[ \frac{\exp\{U_k(0)\}}{\int \exp\{U_k(\mu)\} \pi(\mu) d\mu} < \exp(-Dn_k \delta^2) \right] = 1.$$

By condition (A2) and the boundedness of  $U_k(\mu)$ , we have

$$\lim_{n \rightarrow \infty} \Pr \left[ \frac{\int \exp\{U_k(\mu)\} \pi(\mu) d\mu}{\exp\{U_k(0)\}} > \exp(Dn_k \delta) \right] = 1,$$

which completes the proof.

**Lemma 2.** Let  $\pi(\mu) = \pi_L(\mu)$  be a local prior, and assume that  $\tau_j$  is not a change point, i.e.,  $\mu_{j0} = 0$ , then

$$\frac{\int \prod_{l=\tau_j}^{\tau_{j+1}-1} \exp\{-(Y_l - \bar{Y}_{\tau_j} - \mu)^2\} \pi(\mu) d\mu}{\prod_{l=\tau_j}^{\tau_{j+1}-1} \exp\{-(Y_l - \bar{Y}_{\tau_j})^2\}} = O_p(n_j^{-1/2}).$$

Proof: By the definition of  $U_j(\mu)$ , we can write

$$\frac{\int \exp\{U_j(\mu)\} \pi(\mu) d\mu}{\exp\{U_j(0)\}} = \frac{\int \prod_{l=\tau_j}^{\tau_{j+1}-1} \exp\{-(Y_l - \bar{Y}_{\tau_j} - \mu)^2\} \pi(\mu) d\mu}{\prod_{l=\tau_j}^{\tau_{j+1}-1} \exp\{-(Y_l - \bar{Y}_{\tau_j})^2\}}.$$

Using the same argument as that leading to (4) with  $\mu_{j0} = 0$ , we have

$$\int \exp\{U_j(\mu)\} \pi(\mu) d\mu = O_p[-U''(0)^{-1/2} \exp\{U_j(0)\} \pi(0)].$$

As  $U''(0)^{-1/2} = O_p(n_j^{-1/2})$ , and  $\pi(0)$  is a bounded density, we have

$$\frac{\int \exp\{U_j(\mu)\} \pi(\mu) d\mu}{\exp\{U_j(0)\}} = O_p(n_j^{-1/2}).$$

**Lemma 3.** Let

$$\pi(\mu) = \pi_M(\mu) \equiv \frac{\mu^{2v}}{C_M} \pi_b(\mu),$$

where  $C_M$  is a normalizing constant,  $\pi_b(\mu)$  with  $\pi_b(0) > 0$  is the base prior density with  $2v$  finite moments, and bounded first two derivatives in the neighborhood around 0. Assume that  $\tau_j$  is not a change point, i.e.,  $\mu_{j0} = 0$ , then

$$\frac{\int \prod_{l=\tau_j}^{\tau_{j+1}-1} \exp\{-(Y_l - \bar{Y}_{\tau_j} - \mu)^2\} \pi(\mu) d\mu}{\prod_{l=\tau_j}^{\tau_{j+1}-1} \exp\{-(Y_l - \bar{Y}_{\tau_j})^2\}} = O_p(n_j^{-v-1/2}).$$

Proof: We can write

$$\int \prod_{l=\tau_j}^{\tau_{j+1}-1} \exp\{-(Y_l - \bar{Y}_{\tau_j} - \mu)^2\} \pi(\mu) d\mu = \int \exp\{U_j(\mu) + \log \pi(\mu)\} d\mu.$$

Let  $h(\mu) = U_j(\mu) + \log \pi(\mu) = 2v \log(\mu) + \log\{\pi_b(\mu)\} + U_j(\mu)$ , and let  $\tilde{\mu}$  be the maximizer of  $h(\mu)$ , then we have

$$2v/\tilde{\mu} + \pi'_b(\tilde{\mu})/\pi_b(\tilde{\mu}) + L'_j(\tilde{\mu}) = 0.$$

If we expand  $L'_j(\tilde{\mu})$  around  $\hat{\mu}$ , the least squares estimator for  $\mu_{j0}$ , the above equality can be rewritten as

$$2v/n + n^{-1} \tilde{\mu} \pi'_b(\tilde{\mu})/\pi_b(\tilde{\mu}) + L''_j(\mu^*) \tilde{\mu}(\tilde{\mu} - \hat{\mu}) = 0,$$

where  $\mu^*$  is a point on the line segment between  $\hat{\mu}$  and  $\tilde{\mu}$ . Therefore,

$$\begin{aligned} O_p(n^{-1}) &= \tilde{\mu}(\tilde{\mu} - \hat{\mu}) \\ &= (\tilde{\mu} - \hat{\mu})^2 + \hat{\mu}(\tilde{\mu} - \hat{\mu}) \\ &= (\tilde{\mu} - \hat{\mu} + \hat{\mu}/2)^2 - \hat{\mu}^2/4. \end{aligned}$$

Along with the fact that  $\hat{\mu} = O_p(n_j^{-1/2})$ , we have  $\tilde{\mu} - \hat{\mu} = O_p(n_j^{-1/2})$ , and  $\tilde{\mu} = O_p(n^{-1/2})$ . Next, by the Laplace expansion, we have

$$\int \exp\{h(\mu)\} d\mu = O_p(\{2v/\tilde{\mu}^2 - U''_j(\tilde{\mu})\}^{-1/2} \exp[2v \log(\tilde{\mu}) + \log\{\pi_b(\tilde{\mu})\} + U_j(\tilde{\mu})]),$$

and also

$$\begin{aligned}
n^{-1}U_j(\tilde{\mu}) - n^{-1}U_j(0) &= n^{-1}U'_j(\mu^\dagger)\tilde{\mu} \\
&= n^{-1}\{U'_j(\hat{\mu}) + U'_j(\mu^\dagger) - U'_j(\hat{\mu})\}\tilde{\mu} \\
&= O_p(\mu^\dagger - \hat{\mu})\tilde{\mu} \\
&= O_p(n^{-1}),
\end{aligned} \tag{5}$$

where  $\mu^\dagger$  is a point on the line segment between  $\tilde{\mu}$  and 0. Thus,

$$|U_j(\tilde{\mu}) - U_j(0)| = O_p(1).$$

As a result,

$$\begin{aligned}
&\frac{\int \prod_{l=\tau_j}^{\tau_{j+1}-1} \exp\{-(Y_l - \bar{Y}_{\tau_j} - \mu)^2\} \pi(\mu) d\mu}{\prod_{l=\tau_j}^{\tau_{j+1}-1} \exp\{-(Y_l - \bar{Y}_{\tau_j})^2\}} \\
&= \frac{\int \exp\{U_j(\mu)\} \pi(\mu) d\mu}{\exp\{U_j(0)\}} \\
&= \frac{\int \exp\{h(u)\} du}{\exp\{U_j(0)\}} \\
&= O_p(\{2v/\tilde{\mu}^2 - U''_j(\tilde{\mu})\}^{-1/2} \exp[2v \log(\tilde{\mu}) + \log\{\pi_M(\tilde{\mu})\} + U_j(\tilde{\mu}) - U_j(0)]) \\
&= O_p(n_j^{-1/2} \tilde{\mu}^{2v}) \\
&= O_p(n_j^{-1/2-v}),
\end{aligned}$$

where the last equality holds due to the fact that  $\tilde{\mu} = O_p(n^{-1/2})$ . This completes the proof.

**Lemma 4.** *Let*

$$\pi(\mu) = \pi_I(\mu) \equiv \frac{s\nu^{q/2}}{\Gamma\{q/(2s)\}} \mu^{-(q+1)} \exp\left\{-\left(\frac{\mu^2}{\nu}\right)^{-s}\right\}.$$

Assume that  $\tau_j$  is not a change point, i.e.,  $\mu_{j0} = 0$ , then

$$\frac{\int \prod_{l=\tau_j}^{\tau_{j+1}-1} \exp\{-(Y_l - \bar{Y}_{\tau_j} - \mu)^2\} \pi(\mu) d\mu}{\prod_{l=\tau_j}^{\tau_{j+1}-1} \exp\{-(Y_l - \bar{Y}_{\tau_j})^2\}} = O_p\{\exp(-n_j^{s/(s+1)})\}.$$

Proof: We first write

$$\int \prod_{l=\tau_j}^{\tau_{j+1}-1} \exp\{-(Y_l - \bar{Y}_{\tau_j} - \mu)^2\} \pi(\mu) d\mu = c \int \exp\{U_j(\mu) - \mu^{-2s}\nu^s - (q+1)\log(\mu)\} d\mu,$$

where  $c$  is a constant. Let  $h(\mu) = U_j(\mu) - \mu^{-2s}\nu^s - (q+1)\log(\mu)$ , and assume  $\tilde{\mu}$  is the maximizer of  $h(\mu)$ , then we have

$$U'_j(\tilde{\mu}) + 2s\tilde{\mu}^{-2s-1}\nu^s - (q+1)\tilde{\mu}^{-1} = U'_j(\mu^*)(\tilde{\mu} - \hat{\mu}) + 2s\tilde{\mu}^{-2s-1}\nu^s - (q+1)\tilde{\mu}^{-1} = 0,$$

where  $\mu^*$  is a point on the line segment between  $\tilde{\mu}$  and  $\hat{\mu}$ . The above equality yields

$$n_j \tilde{\mu}^{2s+2} (1 - \hat{\mu}/\tilde{\mu}) = \frac{2s\nu^s - (q+1)\tilde{\mu}^{2s}}{-U''_j(\mu^*)/n_j}, \tag{6}$$

which implies  $\tilde{\mu} = O_p(n_j^{1/(2s+2)})$ .

From (6), we have  $n\tilde{\mu}^{2s+1}(\tilde{\mu} - \hat{\mu}) = O_p(1)$ , which leads to

$$\tilde{\mu} - \hat{\mu} = O_p\{n_j^{-(4s+3)/(2s+2)}\}. \tag{7}$$

Following (30) in [11] and using our notation, we obtain

$$\int \exp\{h(\mu)\}d\mu = O_p \left[ \left\{ \frac{(4s^2 + 2s)^{2s+2}}{\tilde{\mu}} - U_j''(\tilde{\mu}) \right\}^{-1/2} |\tilde{\mu}|^{-q-1} \exp\{-\tilde{\mu}^{-2s}\nu^s + U_j(\tilde{\mu})\} \right].$$

Expanding  $U_j(\tilde{\mu})$  around the least squares estimator  $\hat{\mu}$ , we have

$$\begin{aligned} U_j(\tilde{\mu}) &= U_j(\hat{\mu}) + 1/2 U_j''(\mu^*)(\tilde{\mu} - \hat{\mu})^2 \\ &= U_j(\hat{\mu}) + o_p(1) \\ &= U_j(0) + O_p(1), \end{aligned}$$

where  $\mu^*$  is a point on the line segment between  $\tilde{\mu}$  and  $\hat{\mu}$ , the second equality follows (7), and the last equality follows the same argument as that leading to (5). Therefore, we have

$$\begin{aligned} & \frac{\int \prod_{l=\tau_j}^{\tau_{j+1}-1} \exp\{-(Y_l - \bar{Y}_{\tau_j} - \mu)^2\} \pi(\mu) d\mu}{\prod_{l=\tau_j}^{\tau_{j+1}-1} \exp\{-(Y_l - \bar{Y}_{\tau_j})^2\}} \\ &= \frac{\int \exp\{U_j(\mu)\} \pi(\mu) d\mu}{\exp\{U_j(0)\}} \\ &= \frac{\int \exp\{h(u)\} du}{\exp\{U_j(0)\}} \\ &= O_p \left[ \left\{ \frac{(4s^2 + 2s)^{2s+2}}{\tilde{\mu}} - U_j''(\tilde{\mu}) \right\}^{-1/2} |\tilde{\mu}|^{-q-1} \exp\{-\tilde{\mu}^{-2s}\nu^s + U_j(\tilde{\mu}) - U_j(0)\} \right] \\ &= O_p\{\exp(-n_j^{s/(s+1)})\}, \end{aligned}$$

which completes the proof.

**Lemma 5.** Assume  $p_0 = 1$  and  $\tau_k$  is the only true change point. As  $n_k^{1/2} \delta / \sigma \rightarrow \infty$ ,  $\Pr(M_k | \mathbf{Y}_n) - 1 = O_p\{K_n a_{n_I} \exp(-n_I \delta^2)\}$ . Hence when  $n_I / \log(n) \rightarrow c > 0$ ,  $n_I \leq \lambda$ , we have  $\Pr(M_k | \mathbf{Y}_n) \xrightarrow{p} 1$ .

Proof: First, we can write

$$\Pr(M_k | \mathbf{Y}_n) = \left\{ 1 + \sum_{j \neq k}^{K_n} \frac{\Pr(\mathbf{Y}_n | M_j)}{\Pr(\mathbf{Y}_n | M_k)} \right\}^{-1}. \quad (8)$$

To show  $\Pr(M_k | \mathbf{Y}_n) - 1 \rightarrow 0$ , it is equivalent to showing

$$\sum_{j=1, j \neq k}^{K_n} \frac{\Pr(\mathbf{Y}_n | M_j)}{\Pr(\mathbf{Y}_n | M_p)} \rightarrow 0.$$

Note that

$$\frac{\Pr(\mathbf{Y}_n | M_j)}{\Pr(\mathbf{Y}_n | M_k)} = A \times B,$$

where

$$A = \frac{\int \prod_{l=\tau_j}^{\tau_{j+1}-1} \exp\{-(Y_l - \bar{Y}_{\tau_j} - \mu)^2\} \pi(\mu) d\mu}{\prod_{l=\tau_j}^{\tau_{j+1}-1} \exp\{-(Y_l - \bar{Y}_{\tau_j})^2\}}$$

and

$$B = \frac{\prod_{l=\tau_k}^{\tau_{k+1}-1} \exp\{-(Y_l - \bar{Y}_{\tau_k})^2\}}{\int \prod_{l=\tau_k}^{\tau_{k+1}-1} \exp\{-(Y_l - \bar{Y}_{\tau_k} - \mu)^2\} \pi(\mu) d\mu}.$$

As shown in [11],  $A$  is a Bayes factor whose convergence rate is  $O_p(a_{n_j})$ . For  $B$ , note that the data in  $[\tau_k, \tau_{k+1})$  are generated from the model with mean  $\mu_{k0}$  such that  $|\mu_{k0}| > \delta$ . Hence, we have

$$B = O_p\{\exp(-n_k \delta^2)\},$$

where the last equality holds by Lemma 1 that

$$\lim_{n \rightarrow \infty} \left( \Pr \left[ \frac{\prod_{l=\tau_k}^{\tau_{k+1}-1} \exp\{-(Y_l - \bar{Y}_{\tau_k})^2\}}{\int \prod_{l=\tau_k}^{\tau_{k+1}-1} \exp\{-(Y_l - \bar{Y}_{\tau_k} - \mu)^2\} \pi(\mu) d\mu} < \exp(-D n_k \delta^2) \right] \right) = 1,$$

where  $D$  is a constant. Combining the convergence rates for  $A$  and  $B$ , we have

$$AB = O_p\{a_{n_k} \exp(-n_k \delta^2)\}.$$

Thus, this leads to

$$\frac{\Pr(\mathbf{Y}_n | M_j)}{\Pr(\mathbf{Y}_n | M_k)} = AB = O_p\{a_{n_I} \exp(-n_I \delta^2)\},$$

and

$$\sum_{j=1}^{K_n} \frac{\Pr(\mathbf{Y}_n | M_j)}{\Pr(\mathbf{Y}_n | M_k)} - 1 = O_p\{K_n a_{n_I} \exp(-n_I \delta^2)\}$$

Plugging this result into (8), we have

$$\Pr(M_k | \mathbf{Y}_n) \xrightarrow{p} 1,$$

which completes the proof.

#### Proof of Theorem 1

First, we can write

$$\sum_{M_k \in \mathcal{M}} \Pr(M_k | \mathbf{Y}_n) = \left\{ 1 + \frac{\sum_{M_j \notin \mathcal{M}} \Pr(\mathbf{Y}_n | M_j)}{\sum_{M_k \in \mathcal{M}} \Pr(\mathbf{Y}_n | M_k)} \right\}^{-1}.$$

Note that

$$\frac{\sum_{M_j \notin \mathcal{M}} \Pr(\mathbf{Y}_n | M_j)}{\sum_{M_k \in \mathcal{M}} \Pr(\mathbf{Y}_n | M_k)} \leq \frac{\sum_{M_j \notin \mathcal{M}} \Pr(\mathbf{Y}_n | M_j)}{\Pr(\mathbf{Y}_n | M_k)},$$

for  $M_k \in \mathcal{M}$ . Hence, by the same argument as that leading to Lemma 5, we have

$$\frac{\sum_{M_j \notin \mathcal{M}} \Pr(\mathbf{Y}_n | M_j)}{\sum_{M_k \in \mathcal{M}} \Pr(\mathbf{Y}_n | M_k)} = O_p\{K_n a_{n_I} \exp(-n_I \delta^2)\},$$

and

$$\sum_{M_k \in \mathcal{M}} \Pr(M_k | \mathbf{Y}_n) - 1 = O_p\{K_n a_{n_I} \exp(-n_I \delta^2)\},$$

which completes the proof.

#### Proof of Proposition 1

Following [15], we define  $x$  as an  $n_I$ -flat point so that there is no change-point in  $(x - n_I, x + n_I)$ .

Let  $\mathcal{F}$  be the set of all  $n_I$ -flat points, then

$$\begin{aligned} & \Pr \left\{ \left( \bigcap_{t \in \mathcal{T}_0(p_0)} R_t > C \right) \cap \left( \bigcap_{\tau \in \mathcal{F}} R_\tau < C \right) \right\} \\ &= 1 - \Pr \left\{ \left( \bigcup_{\tau \in \mathcal{T}_0(p_0)} R_\tau > C \right) \cup \left( \bigcup_{\tau \in \mathcal{F}} R_\tau < C \right) \right\} \\ &= 1 - \Pr \left\{ \left( \max_{t \in \mathcal{T}_0(p_0)} R_t > C \right) \cup \left( \min_{\tau \in \mathcal{F}} R_\tau < C \right) \right\} \\ &\geq 1 - \left\{ \Pr \left( \max_{t \in \mathcal{T}_0(p_0)} R_t > C \right) + \Pr \left( \min_{\tau \in \mathcal{F}} R_\tau < C \right) \right\}. \end{aligned}$$

For each  $\tau \in \mathcal{T}_0(p_0)$ ,

$$\Pr(R_\tau < C) = O\{\exp(-n_I \delta^2)\},$$

by Lemma 1. Furthermore, for  $\tau \in \mathcal{F}$ ,

$$\Pr(R_\tau > C) = O(a_{n_I}),$$

by Lemmas 2–4. Hence,

$$\Pr \left\{ \left( \bigcap_{t \in \mathcal{T}_0(p_0)} R_t > C \right) \cap \left( \bigcap_{\tau \in \mathcal{F}} R_\tau < C \right) \right\} \geq 1 - O[\min\{\exp(-n_I \delta^2), a_{n_I}\}].$$

By Lemma 3 in [15], for any  $t \in \mathcal{T}_0(p_0)$  we have a  $\tau \in \mathcal{H}_c(n_I)$  such that

$$\Pr\{t \in (\tau - n_I, \tau + n_I)\} = 1 - O[\min\{\exp(-n_I \delta^2), a_{n_I}\}].$$

### Proof of Theorem 2

We first show that for a given  $p$ ,  $\hat{\mathcal{T}}(p)$  is the maximizer of  $\Pr\{\mathbf{Y}_n | \mathcal{T}(p)\}$ . Based on the BMS procedure,  $\hat{\mathcal{T}}(p)$  is the maximizer of  $\sum_{M_k \in \mathcal{M}} \Pr(M_k | \mathbf{Y}_n)$ , where  $\mathcal{M} = \{M_k, \tau_k \in \mathcal{T}(p)\}$ . As we impose the uniform prior on  $M_k$ ,  $\hat{\mathcal{T}}(p)$  is the maximizer of

$$\begin{aligned} & \sum_{M_k \in \mathcal{M}} \Pr(\mathbf{Y}_n | M_k) \\ &= D_n \sum_{M_k \in \mathcal{M}} \prod_{j=1, j \neq k}^K \prod_{l=\tau_j}^{\tau_{j+1}-1} \exp\{-(Y_l - \bar{Y}_{\tau_j})^2\} \int \prod_{l=\tau_k}^{\tau_{k+1}-1} \exp\{-(Y_l - \bar{Y}_{\tau_k} - \mu)^2\} \pi(\mu) d\mu \\ &= D_n \prod_{j=1}^K \prod_{l=\tau_j}^{\tau_{j+1}-1} \exp\{-(Y_l - \bar{Y}_{\tau_j})^2\} \sum_{M_k \in \mathcal{M}} \frac{\int \prod_{l=\tau_k}^{\tau_{k+1}-1} \exp\{-(Y_l - \bar{Y}_{\tau_k} - \mu)^2\} \pi(\mu) d\mu}{\prod_{l=\tau_k}^{\tau_{k+1}-1} \exp\{-(Y_l - \bar{Y}_{\tau_k})^2\}} \end{aligned} \quad (9)$$

where  $D_n$  is a constant depending on  $n$ . Further note that

$$\begin{aligned} & \Pr\{\mathbf{Y}_n | \mathcal{T}(p)\} \\ &= \prod_{\tau_j \notin \mathcal{T}(p)} \prod_{l=\tau_j}^{\tau_{j+1}-1} \exp\{-(Y_l - \bar{Y}_{\tau_j})^2\} \prod_{\tau_k \in \mathcal{T}(p)} \int \prod_{l=\tau_k}^{\tau_{k+1}-1} \exp\{-(Y_l - \bar{Y}_{\tau_k} - \mu)^2\} \pi(\mu) d\mu \\ &= \prod_{j=1}^K \prod_{l=\tau_j}^{\tau_{j+1}-1} \exp\{-(Y_l - \bar{Y}_{\tau_j})^2\} \prod_{\tau_k \in \mathcal{T}(p)} \frac{\int \prod_{l=\tau_k}^{\tau_{k+1}-1} \exp\{-(Y_l - \bar{Y}_{\tau_k} - \mu)^2\} \pi(\mu) d\mu}{\prod_{l=\tau_k}^{\tau_{k+1}-1} \exp\{-(Y_l - \bar{Y}_{\tau_k})^2\}}. \end{aligned} \quad (10)$$

Comparing (9) and (10), clearly they have the same optimizer, and thus  $\hat{\mathcal{T}}(p)$  is also the maximizer of (10). Hence, our BMS procedure results in the estimators  $\hat{p}$  and  $\hat{\mathcal{T}}(\hat{p})$  that maximize  $\Pr\{\mathbf{Y}_n | \mathcal{T}(p)\}$ .

Next, let  $\mathcal{E}_1$  be the event that at least one  $j$  such that  $t_j \in (\tau_k, \tau_{k+1})$ , and  $\hat{t}_i \neq \tau_k, \hat{t}_i \neq \tau_{k+1}$  for all  $i$  and  $\tau_k, \tau_{k+1} \in \mathcal{H}_c(n_I)$ ,  $\hat{t}_i \in \hat{\mathcal{T}}(\hat{p})$  that maximizes  $\Pr\{\mathbf{Y}_n | \mathcal{T}(p)\}$ . Following similar arguments as those in [5], we show that the probability of  $\mathcal{E}_1$  goes to 0. Suppose that  $\hat{\mathcal{T}}(\hat{p})$  is such an estimate. Consider the first case where  $(t_j - \tau_k + 1)(\tau_{k+1} - \tau_k + 1)^{-1} = O(1)$ ; that is,  $t_j$  is bounded away from  $\tau_k$ . We can choose a set of change points,

$$\begin{aligned} \tilde{\mathcal{T}}(\hat{p} + 1) &\equiv \{\tilde{\tau}_1, \dots, \tilde{\tau}_{\hat{p}+1}\} \\ &= \{\hat{t}_1, \dots, \hat{t}_i, \tau_{k+1}, \hat{t}_{i+1}, \hat{t}_{\hat{p}}\}. \end{aligned}$$

Then,

$$\frac{\Pr\{\mathbf{Y}_n | \hat{\mathcal{T}}(\hat{p})\}}{\Pr\{\mathbf{Y} | \tilde{\mathcal{T}}(\hat{p} + 1)\}} = \frac{\prod_{l=\tau_{k+1}}^{\tau_{k+2}-1} \exp\{-(Y_l - \bar{Y}_{\tau_{k+1}})^2\}}{\int \prod_{l=\tau_{k+1}}^{\tau_{k+2}-1} \exp\{-(Y_l - \bar{Y}_{\tau_{k+1}} - \mu)^2\} \pi(\mu) d\mu}.$$

Because  $\lim_{n \rightarrow \infty} \sup n_I/\lambda < 1/2$ , there is an  $N$ , such that for all  $n > N$ ,  $t_{j+1} > \tau_{k+2}$ , and hence there is no change point within  $(\tau_{k+1}, \tau_{k+2})$ . This prevents the situation where there are more than one change points in between  $\tau_k$  and  $\tau_{k+2}$ . Further for  $n > N$ ,

$$\begin{aligned} E(Y_l - \bar{Y}_{\tau_{k+1}}) &= (\tau_{k+1} - \tau_k + 1)^{-1} E \left\{ \sum_{s=\tau_k}^{t_j} (Y_l - Y_s) + \sum_{s=t_j+1}^{\tau_{k+1}} (Y_l - Y_s) \right\} \\ &\geq (t_j - \tau_k + 1)(\tau_{k+1} - \tau_k + 1)^{-1} \delta. \end{aligned}$$

Therefore, by Lemma 1,

$$\frac{\Pr\{\mathbf{Y}_n | \hat{\mathcal{T}}(\hat{p})\}}{\Pr\{\mathbf{Y} | \tilde{\mathcal{T}}(\hat{p} + 1)\}} = O_p\{\exp(-n_I \delta^2)\}.$$

If  $(t_j - \tau_k + 1)(\tau_{k+1} - \tau_k + 1)^{-1} = o(1)$ , we define

$$\begin{aligned} \tilde{\mathcal{T}}(\hat{p} + 1) &\equiv \{\tilde{\tau}_1, \dots, \tilde{\tau}_{\hat{p}+1}\} \\ &= \{\hat{t}_1, \dots, \hat{t}_i, \tau_k, \hat{t}_{i+1}, \hat{t}_{\hat{p}}\}, \end{aligned}$$

and then

$$\begin{aligned} \frac{\Pr\{\mathbf{Y}_n | \hat{\mathcal{T}}(\hat{p})\}}{\Pr\{\mathbf{Y} | \tilde{\mathcal{T}}(\hat{p} + 1)\}} &= \frac{\prod_{l=\tau_k}^{\tau_{k+1}-1} \exp\{-(Y_l - \bar{Y}_{\tau_k})^2\}}{\int \prod_{l=\tau_k}^{\tau_{k+1}-1} \exp\{-(Y_l - \bar{Y}_{\tau_k} - \mu)^2\} \pi(\mu) d\mu} \\ &= \frac{\prod_{l=t_j}^{\tau_{k+1}-1} \exp\{-(Y_l - \bar{Y}_{\tau_k})^2\}}{\int \prod_{l=t_j}^{\tau_{k+1}-1} \exp\{-(Y_l - \bar{Y}_{\tau_k} - \mu)^2\} \pi(\mu) d\mu} \\ &\quad \times \frac{\int \prod_{l=t_j}^{\tau_{k+1}-1} \exp\{-(Y_l - \bar{Y}_{\tau_k} - \mu)^2\} \pi(\mu) d\mu}{\int \prod_{l=\tau_k}^{\tau_{k+1}-1} \exp\{-(Y_l - \bar{Y}_{\tau_k} - \mu)^2\} \pi(\mu) d\mu} \\ &\quad \times \frac{\prod_{l=\tau_k}^{\tau_{k+1}-1} \exp\{-(Y_l - \bar{Y}_{\tau_k})^2\}}{\prod_{l=t_j}^{\tau_{k+1}-1} \exp\{-(Y_l - \bar{Y}_{\tau_k})^2\}}, \end{aligned}$$

where the first term is of order  $O_p\{\exp(-n_I \delta^2)\}$  by Lemma 1, and the last two terms are of order  $O_p(1)$  because  $(t_j - \tau_k + 1)(\tau_{k+1} - \tau_k + 1)^{-1} = o(1)$ . Therefore,

$$\Pr \left[ \frac{\Pr\{\mathbf{Y}_n | \hat{\mathcal{T}}(\hat{p})\}}{\Pr\{\mathbf{Y} | \tilde{\mathcal{T}}(\hat{p} + 1)\}} > 1 \middle| \mathcal{E}_1 \right] \leq E \left[ \frac{\Pr\{\mathbf{Y}_n | \hat{\mathcal{T}}(\hat{p})\}}{\Pr\{\mathbf{Y} | \tilde{\mathcal{T}}(\hat{p} + 1)\}} \right] = O\{\exp(-n_I \delta^2)\}.$$

As  $\hat{\mathcal{T}}(\hat{p})$  is the maximizer of  $\Pr\{\mathbf{Y}_n | \mathcal{T}(p)\}$ , we have

$$\Pr \left[ \frac{\Pr\{\mathbf{Y}_n | \hat{\mathcal{T}}(\hat{p})\}}{\Pr\{\mathbf{Y} | \tilde{\mathcal{T}}(\hat{p} + 1)\}} > 1 \right] = 1,$$

because  $\hat{\mathcal{T}}(\hat{p})$  is the maximizer of  $\Pr\{\mathbf{Y}_n | \hat{\mathcal{T}}(\hat{p})\}$  and it is unique by condition (A3). By the Bayes rule, we have

$$\Pr \left[ \mathcal{E}_1 \middle| \frac{\Pr\{\mathbf{Y}_n | \hat{\mathcal{T}}(\hat{p})\}}{\Pr\{\mathbf{Y} | \tilde{\mathcal{T}}(\hat{p} + 1)\}} > 1 \right] \leq O\{\exp(-n_I \delta^2)\}. \quad (11)$$

Hence,  $\Pr(\hat{t}_i = \tau_k \text{ or } \hat{t}_i = \tau_{k+1}) = 1 - O\{\exp(-n_I \delta^2)\}$ . Further note that  $\tau_k$  and  $\tau_{k+1}$  are in the  $n_I$ -neighborhood of  $t_j$ , and thus for any  $t_j$ , there is a  $\hat{t}_i$  such that

$$\Pr\{t_j \in (\hat{t}_i - n_I, \hat{t}_i + n_I)\} = 1 - O\{\exp(-n_I \delta^2)\}.$$

As it holds for any  $j$ , we can write

$$\Pr \left\{ \sup_{\hat{t}_j \in \hat{\mathcal{T}}(\hat{p})} \inf_{t_j \in \mathcal{T}_0(p_0)} |(\hat{t}_j - t_j)/n| \leq n_I/n \right\} = 1 - O\{\exp(-n_I \delta^2)\}.$$



Next we show that for any  $\hat{t}_i$  there is a  $t_j$  in the  $n_I$ -neighborhood of  $\hat{t}_i$ . Define  $\mathcal{E}_2$  as the event that there is at least one  $\hat{t}_i$  such that there is no  $t_j$  in the  $n_I$ -neighborhood of  $\hat{t}_i$ . Let  $\hat{\mathcal{T}}(\hat{p})$  be such an estimate that  $\hat{t}_i$  is the  $k$ th candidate point, and  $(\hat{t}_i, \tau_{k+1})$  and  $(\tau_{k-1}, \hat{t}_i)$  do not contain  $t_j$  for all  $j$ . Then, we define a new set of change points by deleting  $\hat{t}_i$ ,

$$\tilde{\mathcal{T}}(\hat{p} - 1) = \{\hat{t}_1, \dots, \hat{t}_{i-1}, \hat{t}_{i+1}, \hat{t}_{\hat{p}}\}.$$

Then,

$$\frac{\Pr\{\mathbf{Y}_n | \hat{\mathcal{T}}(\hat{p})\}}{\Pr\{\mathbf{Y} | \tilde{\mathcal{T}}(\hat{p} - 1)\}} = \frac{\prod_{l=\hat{t}_i}^{\tau_{k+1}-1} \exp\{-(Y_l - \bar{Y}_{\hat{t}_i} - \mu)^2\} \pi(\mu) d\mu}{\prod_{l=\hat{t}_i}^{\tau_{k+1}-1} \exp\{-(Y_l - \bar{Y}_{\hat{t}_i})^2\}} = O_p(a_{n_I})$$

by Lemmas 2–4. Therefore, using the same argument as that leading to (11), we have

$$\Pr \left[ \mathcal{E}_2 \mid \frac{\Pr\{\mathbf{Y}_n | \hat{\mathcal{T}}(\hat{p})\}}{\Pr\{\mathbf{Y} | \tilde{\mathcal{T}}(\hat{p} - 1)\}} > 1 \right] = O(a_{n_I}).$$

For any  $\hat{t}_i$ , there exists a  $t_j$  such that

$$\Pr\{\hat{t}_i \in (t_j - n_I, t_j + n_I)\} = 1 - O(a_{n_I}).$$

It holds for any  $\hat{t}_i$ , and thus we have

$$\Pr \left[ \sup_{t_j \in \mathcal{T}_0(p_0)} \inf_{\hat{t}_j \in \hat{\mathcal{T}}(\hat{p})} |(\hat{t}_j - t_j)/n| < n_I/n \right] = 1 - O(a_{n_I}).$$

Because  $(t_j - n_I, t_j + n_I)$  contains only one estimate by the definition of  $\hat{\mathcal{T}}(\hat{p})$  that  $|\hat{t}_{j+1} - \hat{t}_j| > \lambda$ , we have  $\Pr(\hat{p} = p_0) = 1 - O_p(\max\{\exp(-n_I \delta^2), a_{n_I}\})$  by using the same arguments as those leading to Theorem 3.3 in [5].  $\square$
